# Supplementary material for: Associations between plant-based diets and cardiovascular disease, frailty, and cognitive dysfunction in middle and old age: a systematic review and meta-analysis of cohort studies
Source: Royal Society of Chemistry journal article supplement (doi:10.1039/d4fo03384a), 2025-01-01
Supplement: d4fo03384a3.pdf [file d4fo03384a3.pdf]

| Author          | Data from                          | Study type   | Time      | Age         | Female (%) | Case                                 | Total  | BMI        | Follo w-up time | Dietary assessment mode                               | Diet type   | Outcome                               | Adjusted                                                                                                                                                                                                                                                                                                                                                                                                                                                                                                                                                                                                                                                                                                                     |
|-----------------|------------------------------------|--------------|-----------|-------------|------------|--------------------------------------|--------|------------|-----------------|-------------------------------------------------------|-------------|---------------------------------------|------------------------------------------------------------------------------------------------------------------------------------------------------------------------------------------------------------------------------------------------------------------------------------------------------------------------------------------------------------------------------------------------------------------------------------------------------------------------------------------------------------------------------------------------------------------------------------------------------------------------------------------------------------------------------------------------------------------------------|
| Jihye Kim 2024  | The Multiethnic Cohort Study (MEC) | Cohort Study | 1993-2019 | 59.0 (8.7 ) | 0          | 9837                                 | 66357  | 26.6 (4.0) | 21              | A quantitative food frequency questionnaire (FFQ)     | hPDI 、 uPDI | CVD mortality                         | Age at cohort entry, race and ethnicity, education, marital status, history of diabetes, body mass index, smoking status, pack-years of cigarette, physical activity, menopausal hormone therapy use for women only, alcohol consumption, and total energy intake.                                                                                                                                                                                                                                                                                                                                                                                                                                                           |
| Yanping Li 2023 | The Million Veteran Program        | Cohort Study | 2011-2020 | 61.2 1      | 12.14      | 2858 for CVD, 2167 for CVD mortality | 148506 | 28.98      | 3.8             | Semi quantitative Food Frequency Questionnaire (sFFQ) | hPDI 、 uPDI | CVD 、 CVD mortality 、 Ischemic stroke | Age (continuous), sex (male or female), race/ethnicity (European Americans, African American or other), education level (≤high school or GED, some colleague, or college or above), income level (<US\$30 000, US\$30 000–US\$59 000 or ≥US\$60 000) and marital status (currently married or not), smoking status(current, former or never smoking), frequency of alcohol consumption (never, <1 times/week or ≥1 times/week), frequency of exercise vigorously (never/rarely, 1–4 times/month, 2–4 times/week or ≥5 times/week, total energy intake (in quintiles), body mass index (<23.0, 23.0–24.9, 25.0–29.9, 30.0–34.9 or ≥35.0 kg/m2) and histories of hypertension and hypercholesterolemia at baseline (yes vs no) |

|                         |                                                                                   |              |           |       |      |                                                                     |        |       |      |                                      |           |                                        |                                                                                                                                                                                                                                                                                                                                                                                                                             |
|-------------------------|-----------------------------------------------------------------------------------|--------------|-----------|-------|------|---------------------------------------------------------------------|--------|-------|------|--------------------------------------|-----------|----------------------------------------|-----------------------------------------------------------------------------------------------------------------------------------------------------------------------------------------------------------------------------------------------------------------------------------------------------------------------------------------------------------------------------------------------------------------------------|
| Magda Gamba 2023        | The CoLaus study                                                                  | Cohort Study | 2009-2021 | 57.2  | 54.8 | 262 for CVD, 49 for CVD mortality                                   | 3721   | 25.86 | 9    | Semi-quantitative FFQ                | hPDI      | CVD、CVD mortality                      | Age, sex, educational level, smoking status, alcohol consumption, physical activity, BMI, total caloric intake (only for the hPBD), dieting, type 2 diabetes, hypertension, hypercholesterolemia, and family history of CVD.                                                                                                                                                                                                |
| Alysha S. Thompson 2022 | Multicentre prospective population-based study in the United Kingdom (UK Biobank) | Cohort Study | 2006-2022 | 56.1  | 55.9 | 6890 for CVD, 1151 for Ischemic stroke, 489 for Haemorrhagic stroke | 126394 | 26.69 | 11.4 | The Oxford WebQ tool                 | hPDI、uPDI | CVD、Ischemic stroke、Hemorrhagic stroke | Sex, body mass index, race and ethnicity, physical activity level, smoking status, alcohol intake, education level, energy intake, polypharmacy index, multimorbidity index, and aspirin use, stratified by region.                                                                                                                                                                                                         |
| M Delgado-Velandia 2022 | The Study on Nutrition and Cardiovascular Risk in Spain (ENRICA)                  | Cohort Study | 2008-2020 | 47.01 | 54   | 157                                                                 | 11825  | 26.95 | 9.8  | Electronic diet history (HD-ENRICA), | hPDI、uPDI | CVD mortality                          | Age (years), sex (men, women), education (≤primary, secondary, and university), smoking status (never, former, and current smoker), body mass index (kg/m2), energy intake (kcal/day), alcohol intake (never drinker, former drinker, moderate alcohol intake, excessive alcohol intake), recreational physical activity (tertiles), number of chronic diseases (continuous), and number of medications taken (continuous). |

|                         |                                                             |              |           |       |       |     |       |       |      |                                                              |                   |     |                                                                                                                                                                                                                                                                                                                                                                                                                                                                                                                                                                                                                                                                                                                                                                                                                             |
|-------------------------|-------------------------------------------------------------|--------------|-----------|-------|-------|-----|-------|-------|------|--------------------------------------------------------------|-------------------|-----|-----------------------------------------------------------------------------------------------------------------------------------------------------------------------------------------------------------------------------------------------------------------------------------------------------------------------------------------------------------------------------------------------------------------------------------------------------------------------------------------------------------------------------------------------------------------------------------------------------------------------------------------------------------------------------------------------------------------------------------------------------------------------------------------------------------------------------|
| Yi-Yun Chen 2022        | Hispanic Community Health Study/Study of Latinos(HC HS/SOL) | Cohort Study | 2008-2020 | 40.9  | 59    | 232 | 10293 | 29.26 | 6    | Two 24-h dietary recalls                                     | hPDI              | CVD | Age, sex, study field center, Hispanic/Latino background, generation status, education, smoking, alcohol consumption (not for aMED), total energy intake, physical activity, BMI, and use of antidiabetic drugs, antihypertensive drugs, or lipid-lowering drugs.                                                                                                                                                                                                                                                                                                                                                                                                                                                                                                                                                           |
| Matina Kouvari 2022     | ATTICA study                                                | Cohort Study | 2002-2012 | 39.89 | 45.74 | 317 | 2020  | 25.79 | 8.41 | Semi-quantitative, paper-based, food frequency questionnaire | hPDI<br>、<br>uPDI | CVD | Energy intake (kcal), demographic characteristics, Lifestyle and anthropometric characteristics, history of diabetes, hypertension and hypercholesterolemia and family CVD history and Alcohol consumption. Day of the week on which 24-h dietary recall was collected [weekday/weekend (Friday–Sunday)], sequence of dietary recall (first or second), baseline age (continuous), or education (less than secondary school graduation; secondary school graduation; some postsecondary; postsecondary graduation), smoking (daily/occasional smoker with $20 \leq$ cigarettes/d < 90; daily/occasional smoker with <20 cigarettes/d; former daily/occasional smoker and those who smoked a total of $\geq 100$ cigarettes in lifetime; never smoked), misreporting (under-reporter; plausible reporter and over-reporter), |
| Svilena V Lazarova 2022 | Canadian Community Health Survey (CCHS)-Nutrition           | Cohort Study | 2004-2017 | 48.66 | 50.64 | 748 | 14026 | 27.45 | 11   | 24-h dietary recalls                                         | hPDI<br>、<br>uPDI | CVD |                                                                                                                                                                                                                                                                                                                                                                                                                                                                                                                                                                                                                                                                                                                                                                                                                             |

|  |  |  |  |  |  |  |  |  |  |  |  |  |  |  |  |  |  |  |  |  |  |  |  |  |  |  |  |  |  |  |  |  |  |  |  |  |  |  |  |  |  |  |  |  |  |  |  |  |  |  |  |  |  |  |  |  |  |  |  |  |  |  |  |  |  |  |  |  |  |  |  |  |  |  |  |  |  |  |  |  |  |  |  |  |  |  |  |  |  |  |  |  |  |  |  |  |  |  |  |  |  |  |  |  |  |  |  |  |  |  |  |  |  |  |  |  |  |  |  |  |  |  |  |  |  |  |  |  |  |  |  |  |  |  |  |  |  |  |  |  |  |  |  |  |  |  |  |  |  |  |  |  |  |  |  |  |  |  |  |  |  |  |  |  |  |  |  |  |  |  |  |  |  |  |  |  |  |  |  |  |  |  |  |  |  |  |  |  |  |  |  |  |  |  |  |  |  |  |  |  |  |  |  |  |  |  |  |  |  |  |  |  |  |  |  |  |  |  |  |  |  |  |  |  |  |  |  |  |  |  |  |  |  |  |  |  |  |  |  |  |  |  |  |  |  |  |  |  |  |  |  |  |  |  |  |  |  |  |  |  |  |  |  |  |  |  |  |  |  |  |  |  |  |  |  |  |  |  |  |  |  |  |  |  |  |  |  |  |  |  |  |  |  |  |  |  |  |  |  |  |  |  |  |  |  |  |  |  |  |  |  |  |  |  |  |  |  |  |  |  |  |  |  |  |  |  |  |  |  |  |  |  |  |  |  |  |  |  |  |  |  |  |  |  |  |  |  |  |  |  |  |  |  |  |  |  |  |  |  |  |  |  |  |  |  |  |  |  |  |  |  |  |  |  |  |  |  |  |  |  |  |  |  |  |  |  |  |  |  |  |  |  |  |  |  |  |  |  |  |  |  |  |  |  |  |  |  |  |  |  |  |  |  |  |  |  |  |  |  |  |  |  |  |  |  |  |  |  |  |  |  |  |  |  |  |  |  |  |  |  |  |  |  |  |  |  |  |  |  |  |  |  |  |  |  |  |  |  |  |  |  |  |  |  |  |  |  |  |  |  |  |  |  |  |  |  |  |  |  |  |  |  |  |  |  |  |  |  |  |  |  |  |  |  |  |  |  |  |  |  |  |  |  |  |  |  |  |  |  |  |  |  |  |  |  |  |  |  |  |  |  |  |  |  |  |  |  |  |  |  |  |  |  |  |  |  |  |  |  |  |  |  |  |  |  |  |  |  |  |  |  |  |  |  |  |  |  |  |  |  |  |  |  |  |  |  |  |  |  |  |  |  |  |  |  |  |  |  |  |  |  |  |  |  |  |  |  |  |  |  |  |  |  |  |  |  |  |  |  |  |  |  |  |  |  |  |  |  |  |  |  |  |  |  |  |  |  |  |  |  |  |  |  |  |  |  |  |  |  |  |  |  |  |  |  |  |  |  |  |  |  |  |  |  |  |  |  |  |  |  |  |  |  |  |  |  |  |  |  |  |  |  |  |  |  |  |  |  |  |  |  |  |  |  |  |  |  |  |  |  |  |  |  |  |  |  |  |  |  |  |  |  |  |  |  |  |  |  |  |  |  |  |  |  |  |  |  |  |  |  |  |  |  |  |  |  |  |  |  |  |  |  |  |  |  |  |  |  |  |  |  |  |  |  |  |  |  |  |  |  |  |  |  |  |  |  |  |  |  |  |  |  |  |  |  |  |  |  |  |  |  |  |  |  |  |  |  |  |  |  |  |  |  |  |  |  |  |  |  |  |  |  |  |  |  |  |  |  |  |  |  |  |  |  |  |  |  |  |  |  |  |  |  |  |  |  |  |  |  |  |  |  |  |  |  |  |  |  |  |  |  |  |  |  |  |  |  |  |  |  |  |  |  |  |  |  |  |  |  |  |  |  |  |  |  |  |  |  |  |  |  |  |  |  |  |  |  |  |  |  |  |  |  |  |  |  |  |  |  |  |  |  |  |  |  |  |  |  |  |  |  |  |  |  |  |  |  |  |  |  |  |  |  |  |  |  |  |  |  |  |  |  |  |  |  |  |  |  |  |  |  |  |  |  |  |  |  |  |  |  |  |  |  |  |  |  |  |  |  |  |  |  |  |  |  |  |  |  |  |  |  |  |  |  |  |  |  |  |  |  |  |  |  |  |  |  |  |  |  |  |  |  |  |  |  |  |  |  |  |  |  |  |  |  |  |  |  |  |  |  |  |  |  |  |  |  |  |  |  |  |  |  |  |  |  |  |  |  |  |  |  |  |  |  |  |  |  |  |  |  |  |  |  |  |  |  |  |  |  |  |  |  |  |  |  |  |  |  |  |  |  |  |  |  |  |  |  |  |  |  |  |  |  |  |  |  |  |  |  |  |  |  |  |  |  |  |  |  |  |  |  |  |  |  |  |  |  |  |  |  |  |  |  |  |  |  |  |  |  |  |  |  |  |  |  |  |  |  |  |  |  |  |  |  |  |  |  |  |  |  |  |  |  |  |  |  |  |  |  |  |  |  |  |  |  |  |  |  |  |  |  |  |  |  |  |  |  |  |  |  |  |  |  |  |  |  |  |  |  |  |  |  |  |  |  |  |  |  |  |  |  |  |  |  |  |  |  |  |  |  |  |  |  |  |  |  |  |  |  |  |  |  |  |  |  |  |  |  |  |  |  |  |  |  |  |  |  |  |  |  |  |  |  |  |  |  |  |  |  |  |  |  |  |  |  |  |  |  |  |  |  |  |  |  |  |  |  |  |  |  |  |  |  |  |  |  |  |  |  |  |  |  |  |  |  |  |  |  |  |  |  |  |  |  |  |  |  |  |  |  |  |  |  |  |  |  |  |  |  |  |  |  |  |  |  |  |  |  |  |  |  |  |  |  |  |  |  |  |  |  |  |  |  |  |  |  |  |  |  |  |  |  |  |  |  |  |  |  |  |  |  |  |  |  |  |  |  |  |  |  |  |  |  |  |  |  |  |  |  |  |  |  |  |  |  |  |  |  |  |  |  |  |  |  |  |  |  |  |  |  |  |  |  |  |  |  |  |  |  |  |  |  |  |  |  |  |  |  |  |  |  |  |  |  |  |  |  |
|--|--|--|--|--|--|--|--|--|--|--|--|--|--|--|--|--|--|--|--|--|--|--|--|--|--|--|--|--|--|--|--|--|--|--|--|--|--|--|--|--|--|--|--|--|--|--|--|--|--|--|--|--|--|--|--|--|--|--|--|--|--|--|--|--|--|--|--|--|--|--|--|--|--|--|--|--|--|--|--|--|--|--|--|--|--|--|--|--|--|--|--|--|--|--|--|--|--|--|--|--|--|--|--|--|--|--|--|--|--|--|--|--|--|--|--|--|--|--|--|--|--|--|--|--|--|--|--|--|--|--|--|--|--|--|--|--|--|--|--|--|--|--|--|--|--|--|--|--|--|--|--|--|--|--|--|--|--|--|--|--|--|--|--|--|--|--|--|--|--|--|--|--|--|--|--|--|--|--|--|--|--|--|--|--|--|--|--|--|--|--|--|--|--|--|--|--|--|--|--|--|--|--|--|--|--|--|--|--|--|--|--|--|--|--|--|--|--|--|--|--|--|--|--|--|--|--|--|--|--|--|--|--|--|--|--|--|--|--|--|--|--|--|--|--|--|--|--|--|--|--|--|--|--|--|--|--|--|--|--|--|--|--|--|--|--|--|--|--|--|--|--|--|--|--|--|--|--|--|--|--|--|--|--|--|--|--|--|--|--|--|--|--|--|--|--|--|--|--|--|--|--|--|--|--|--|--|--|--|--|--|--|--|--|--|--|--|--|--|--|--|--|--|--|--|--|--|--|--|--|--|--|--|--|--|--|--|--|--|--|--|--|--|--|--|--|--|--|--|--|--|--|--|--|--|--|--|--|--|--|--|--|--|--|--|--|--|--|--|--|--|--|--|--|--|--|--|--|--|--|--|--|--|--|--|--|--|--|--|--|--|--|--|--|--|--|--|--|--|--|--|--|--|--|--|--|--|--|--|--|--|--|--|--|--|--|--|--|--|--|--|--|--|--|--|--|--|--|--|--|--|--|--|--|--|--|--|--|--|--|--|--|--|--|--|--|--|--|--|--|--|--|--|--|--|--|--|--|--|--|--|--|--|--|--|--|--|--|--|--|--|--|--|--|--|--|--|--|--|--|--|--|--|--|--|--|--|--|--|--|--|--|--|--|--|--|--|--|--|--|--|--|--|--|--|--|--|--|--|--|--|--|--|--|--|--|--|--|--|--|--|--|--|--|--|--|--|--|--|--|--|--|--|--|--|--|--|--|--|--|--|--|--|--|--|--|--|--|--|--|--|--|--|--|--|--|--|--|--|--|--|--|--|--|--|--|--|--|--|--|--|--|--|--|--|--|--|--|--|--|--|--|--|--|--|--|--|--|--|--|--|--|--|--|--|--|--|--|--|--|--|--|--|--|--|--|--|--|--|--|--|--|--|--|--|--|--|--|--|--|--|--|--|--|--|--|--|--|--|--|--|--|--|--|--|--|--|--|--|--|--|--|--|--|--|--|--|--|--|--|--|--|--|--|--|--|--|--|--|--|--|--|--|--|--|--|--|--|--|--|--|--|--|--|--|--|--|--|--|--|--|--|--|--|--|--|--|--|--|--|--|--|--|--|--|--|--|--|--|--|--|--|--|--|--|--|--|--|--|--|--|--|--|--|--|--|--|--|--|--|--|--|--|--|--|--|--|--|--|--|--|--|--|--|--|--|--|--|--|--|--|--|--|--|--|--|--|--|--|--|--|--|--|--|--|--|--|--|--|--|--|--|--|--|--|--|--|--|--|--|--|--|--|--|--|--|--|--|--|--|--|--|--|--|--|--|--|--|--|--|--|--|--|--|--|--|--|--|--|--|--|--|--|--|--|--|--|--|--|--|--|--|--|--|--|--|--|--|--|--|--|--|--|--|--|--|--|--|--|--|--|--|--|--|--|--|--|--|--|--|--|--|--|--|--|--|--|--|--|--|--|--|--|--|--|--|--|--|--|--|--|--|--|--|--|--|--|--|--|--|--|--|--|--|--|--|--|--|--|--|--|--|--|--|--|--|--|--|--|--|--|--|--|--|--|--|--|--|--|--|--|--|--|--|--|--|--|--|--|--|--|--|--|--|--|--|--|--|--|--|--|--|--|--|--|--|--|--|--|--|--|--|--|--|--|--|--|--|--|--|--|--|--|--|--|--|--|--|--|--|--|--|--|--|--|--|--|--|--|--|--|--|--|--|--|--|--|--|--|--|--|--|--|--|--|--|--|--|--|--|--|--|--|--|--|--|--|--|--|--|--|--|--|--|--|--|--|--|--|--|--|--|--|--|--|--|--|--|--|--|--|--|--|--|--|--|--|--|--|--|--|--|--|--|--|--|--|--|--|--|--|--|--|--|--|--|--|--|--|--|--|--|--|--|--|--|--|--|--|--|--|--|--|--|--|--|--|--|--|--|--|--|--|--|--|--|--|--|--|--|--|--|--|--|--|--|--|--|--|--|--|--|--|--|--|--|--|--|--|--|--|--|--|--|--|--|--|--|--|--|--|--|--|--|--|--|--|--|--|--|--|--|--|--|--|--|--|--|--|--|--|--|--|--|--|--|--|--|--|--|--|--|--|--|--|--|--|--|--|--|--|--|--|--|--|--|--|--|--|--|--|--|--|--|--|--|--|--|--|--|--|--|--|--|--|--|--|--|--|--|--|--|--|--|--|--|--|--|--|--|--|--|--|--|--|--|--|--|--|--|--|--|--|--|--|--|--|--|--|--|--|--|--|--|--|--|--|--|--|--|--|--|--|--|--|--|--|--|--|--|--|--|--|--|--|--|--|--|--|--|--|--|--|--|--|--|--|--|--|--|--|--|--|--|--|--|--|--|--|--|--|--|--|--|--|--|--|--|--|--|--|--|--|--|--|--|--|--|--|--|--|--|--|--|--|--|--|--|--|--|--|--|--|--|--|--|--|--|--|--|--|--|--|--|--|--|--|--|--|--|--|--|--|--|--|--|--|--|--|--|--|--|--|--|--|--|--|--|--|--|--|--|--|--|--|--|--|--|--|--|--|--|--|--|--|--|--|--|--|--|--|--|--|--|--|--|--|--|--|--|--|--|--|--|--|--|--|--|--|--|--|--|--|--|--|--|--|--|
|  |  |  |  |  |  |  |  |  |  |  |  |  |  |  |  |  |  |  |  |  |  |  |  |  |  |  |  |  |  |  |  |  |  |  |  |  |  |  |  |  |  |  |  |  |  |  |  |  |  |  |  |  |  |  |  |  |  |  |  |  |  |  |  |  |  |  |  |  |  |  |  |  |  |  |  |  |  |  |  |  |  |  |  |  |  |  |  |  |  |  |  |  |  |  |  |  |  |  |  |  |  |  |  |  |  |  |  |  |  |  |  |  |  |  |  |  |  |  |  |  |  |  |  |  |  |  |  |  |  |  |  |  |  |  |  |  |  |  |  |  |  |  |  |  |  |  |  |  |  |  |  |  |  |  |  |  |  |  |  |  |  |  |  |  |  |  |  |  |  |  |  |  |  |  |  |  |  |  |  |  |  |  |  |  |  |  |  |  |  |  |  |  |  |  |  |  |  |  |  |  |  |  |  |  |  |  |  |  |  |  |  |  |  |  |  |  |  |  |  |  |  |  |  |  |  |  |  |  |  |  |  |  |  |  |  |  |  |  |  |  |  |  |  |  |  |  |  |  |  |  |  |  |  |  |  |  |  |  |  |  |  |  |  |  |  |  |  |  |  |  |  |  |  |  |  |  |  |  |  |  |  |  |  |  |  |  |  |  |  |  |  |  |  |  |  |  |  |  |  |  |  |  |  |  |  |  |  |  |  |  |  |  |  |  |  |  |  |  |  |  |  |  |  |  |  |  |  |  |  |  |  |  |  |  |  |  |  |  |  |  |  |  |  |  |  |  |  |  |  |  |  |  |  |  |  |  |  |  |  |  |  |  |  |  |  |  |  |  |  |  |  |  |  |  |  |  |  |  |  |  |  |  |  |  |  |  |  |  |  |  |  |  |  |  |  |  |  |  |  |  |  |  |  |  |  |  |  |  |  |  |  |  |  |  |  |  |  |  |  |  |  |  |  |  |  |  |  |  |  |  |  |  |  |  |  |  |  |  |  |  |  |  |  |  |  |  |  |  |  |  |  |  |  |  |  |  |  |  |  |  |  |  |  |  |  |  |  |  |  |  |  |  |  |  |  |  |  |  |  |  |  |  |  |  |  |  |  |  |  |  |  |  |  |  |  |  |  |  |  |  |  |  |  |  |  |  |  |  |  |  |  |  |  |  |  |  |  |  |  |  |  |  |  |  |  |  |  |  |  |  |  |  |  |  |  |  |  |  |  |  |  |  |  |  |  |  |  |  |  |  |  |  |  |  |  |  |  |  |  |  |  |  |  |  |  |  |  |  |  |  |  |  |  |  |  |  |  |  |  |  |  |  |  |  |  |  |  |  |  |  |  |  |  |  |  |  |  |  |  |  |  |  |  |  |  |  |  |  |  |  |  |  |  |  |  |  |  |  |  |  |  |  |  |  |  |  |  |  |  |  |  |  |  |  |  |  |  |  |  |  |  |  |  |  |  |  |  |  |  |  |  |  |  |  |  |  |  |  |  |  |  |  |  |  |  |  |  |  |  |  |  |  |  |  |  |  |  |  |  |  |  |  |  |  |  |  |  |  |  |  |  |  |  |  |  |  |  |  |  |  |  |  |  |  |  |  |  |  |  |  |  |  |  |  |  |  |  |  |  |  |  |  |  |  |  |  |  |  |  |  |  |  |  |  |  |  |  |  |  |  |  |  |  |  |  |  |  |  |  |  |  |  |  |  |  |  |  |  |  |  |  |  |  |  |  |  |  |  |  |  |  |  |  |  |  |  |  |  |  |  |  |  |  |  |  |  |  |  |  |  |  |  |  |  |  |  |  |  |  |  |  |  |  |  |  |  |  |  |  |  |  |  |  |  |  |  |  |  |  |  |  |  |  |  |  |  |  |  |  |  |  |  |  |  |  |  |  |  |  |  |  |  |  |  |  |  |  |  |  |  |  |  |  |  |  |  |  |  |  |  |  |  |  |  |  |  |  |  |  |  |  |  |  |  |  |  |  |  |  |  |  |  |  |  |  |  |  |  |  |  |  |  |  |  |  |  |  |  |  |  |  |  |  |  |  |  |  |  |  |  |  |  |  |  |  |  |  |  |  |  |  |  |  |  |  |  |  |  |  |  |  |  |  |  |  |  |  |  |  |  |  |  |  |  |  |  |  |  |  |  |  |  |  |  |  |  |  |  |  |  |  |  |  |  |  |  |  |  |  |  |  |  |  |  |  |  |  |  |  |  |  |  |  |  |  |  |  |  |  |  |  |  |  |  |  |  |  |  |  |  |  |  |  |  |  |  |  |  |  |  |  |  |  |  |  |  |  |  |  |  |  |  |  |  |  |  |  |  |  |  |  |  |  |  |  |  |  |  |  |  |  |  |  |  |  |  |  |  |  |  |  |  |  |  |  |  |  |  |  |  |  |  |  |  |  |  |  |  |  |  |  |  |  |  |  |  |  |  |  |  |  |  |  |  |  |  |  |  |  |  |  |  |  |  |  |  |  |  |  |  |  |  |  |  |  |  |  |  |  |  |  |  |  |  |  |  |  |  |  |  |  |  |  |  |  |  |  |  |  |  |  |  |  |  |  |  |  |  |  |  |  |  |  |  |  |  |  |  |  |  |  |  |  |  |  |  |  |  |  |  |  |  |  |  |  |  |  |  |  |  |  |  |  |  |  |  |  |  |  |  |  |  |  |  |  |  |  |  |  |  |  |  |  |  |  |  |  |  |  |  |  |  |  |  |  |  |  |  |  |  |  |  |  |  |  |  |  |  |  |  |  |  |  |  |  |  |  |  |  |  |  |  |  |  |  |  |  |  |  |  |  |  |  |  |  |  |  |  |  |  |  |  |  |  |  |  |  |  |  |  |  |  |  |  |  |  |  |  |  |  |  |  |  |  |  |  |  |  |  |  |  |  |  |  |  |  |  |  |  |  |  |  |  |  |  |  |  |  |  |  |  |  |  |  |  |  |  |  |  |  |  |  |  |  |  |  |  |  |  |  |  |  |  |  |  |  |  |  |  |  |  |  |  |  |  |  |  |  |  |  |  |  |  |  |  |  |  |  |  |  |  |  |  |  |  |  |  |  |  |  |  |  |  |  |  |  |  |
|--|--|--|--|--|--|--|--|--|--|--|--|--|--|--|--|--|--|--|--|--|--|--|--|--|--|--|--|--|--|--|--|--|--|--|--|--|--|--|--|--|--|--|--|--|--|--|--|--|--|--|--|--|--|--|--|--|--|--|--|--|--|--|--|--|--|--|--|--|--|--|--|--|--|--|--|--|--|--|--|--|--|--|--|--|--|--|--|--|--|--|--|--|--|--|--|--|--|--|--|--|--|--|--|--|--|--|--|--|--|--|--|--|--|--|--|--|--|--|--|--|--|--|--|--|--|--|--|--|--|--|--|--|--|--|--|--|--|--|--|--|--|--|--|--|--|--|--|--|--|--|--|--|--|--|--|--|--|--|--|--|--|--|--|--|--|--|--|--|--|--|--|--|--|--|--|--|--|--|--|--|--|--|--|--|--|--|--|--|--|--|--|--|--|--|--|--|--|--|--|--|--|--|--|--|--|--|--|--|--|--|--|--|--|--|--|--|--|--|--|--|--|--|--|--|--|--|--|--|--|--|--|--|--|--|--|--|--|--|--|--|--|--|--|--|--|--|--|--|--|--|--|--|--|--|--|--|--|--|--|--|--|--|--|--|--|--|--|--|--|--|--|--|--|--|--|--|--|--|--|--|--|--|--|--|--|--|--|--|--|--|--|--|--|--|--|--|--|--|--|--|--|--|--|--|--|--|--|--|--|--|--|--|--|--|--|--|--|--|--|--|--|--|--|--|--|--|--|--|--|--|--|--|--|--|--|--|--|--|--|--|--|--|--|--|--|--|--|--|--|--|--|--|--|--|--|--|--|--|--|--|--|--|--|--|--|--|--|--|--|--|--|--|--|--|--|--|--|--|--|--|--|--|--|--|--|--|--|--|--|--|--|--|--|--|--|--|--|--|--|--|--|--|--|--|--|--|--|--|--|--|--|--|--|--|--|--|--|--|--|--|--|--|--|--|--|--|--|--|--|--|--|--|--|--|--|--|--|--|--|--|--|--|--|--|--|--|--|--|--|--|--|--|--|--|--|--|--|--|--|--|--|--|--|--|--|--|--|--|--|--|--|--|--|--|--|--|--|--|--|--|--|--|--|--|--|--|--|--|--|--|--|--|--|--|--|--|--|--|--|--|--|--|--|--|--|--|--|--|--|--|--|--|--|--|--|--|--|--|--|--|--|--|--|--|--|--|--|--|--|--|--|--|--|--|--|--|--|--|--|--|--|--|--|--|--|--|--|--|--|--|--|--|--|--|--|--|--|--|--|--|--|--|--|--|--|--|--|--|--|--|--|--|--|--|--|--|--|--|--|--|--|--|--|--|--|--|--|--|--|--|--|--|--|--|--|--|--|--|--|--|--|--|--|--|--|--|--|--|--|--|--|--|--|--|--|--|--|--|--|--|--|--|--|--|--|--|--|--|--|--|--|--|--|--|--|--|--|--|--|--|--|--|--|--|--|--|--|--|--|--|--|--|--|--|--|--|--|--|--|--|--|--|--|--|--|--|--|--|--|--|--|--|--|--|--|--|--|--|--|--|--|--|--|--|--|--|--|--|--|--|--|--|--|--|--|--|--|--|--|--|--|--|--|--|--|--|--|--|--|--|--|--|--|--|--|--|--|--|--|--|--|--|--|--|--|--|--|--|--|--|--|--|--|--|--|--|--|--|--|--|--|--|--|--|--|--|--|--|--|--|--|--|--|--|--|--|--|--|--|--|--|--|--|--|--|--|--|--|--|--|--|--|--|--|--|--|--|--|--|--|--|--|--|--|--|--|--|--|--|--|--|--|--|--|--|--|--|--|--|--|--|--|--|--|--|--|--|--|--|--|--|--|--|--|--|--|--|--|--|--|--|--|--|--|--|--|--|--|--|--|--|--|--|--|--|--|--|--|--|--|--|--|--|--|--|--|--|--|--|--|--|--|--|--|--|--|--|--|--|--|--|--|--|--|--|--|--|--|--|--|--|--|--|--|--|--|--|--|--|--|--|--|--|--|--|--|--|--|--|--|--|--|--|--|--|--|--|--|--|--|--|--|--|--|--|--|--|--|--|--|--|--|--|--|--|--|--|--|--|--|--|--|--|--|--|--|--|--|--|--|--|--|--|--|--|--|--|--|--|--|--|--|--|--|--|--|--|--|--|--|--|--|--|--|--|--|--|--|--|--|--|--|--|--|--|--|--|--|--|--|--|--|--|--|--|--|--|--|--|--|--|--|--|--|--|--|--|--|--|--|--|--|--|--|--|--|--|--|--|--|--|--|--|--|--|--|--|--|--|--|--|--|--|--|--|--|--|--|--|--|--|--|--|--|--|--|--|--|--|--|--|--|--|--|--|--|--|--|--|--|--|--|--|--|--|--|--|--|--|--|--|--|--|--|--|--|--|--|--|--|--|--|--|--|--|--|--|--|--|--|--|--|--|--|--|--|--|--|--|--|--|--|--|--|--|--|--|--|--|--|--|--|--|--|--|--|--|--|--|--|--|--|--|--|--|--|--|--|--|--|--|--|--|--|--|--|--|--|--|--|--|--|--|--|--|--|--|--|--|--|--|--|--|--|--|--|--|--|--|--|--|--|--|--|--|--|--|--|--|--|--|--|--|--|--|--|--|--|--|--|--|--|--|--|--|--|--|--|--|--|--|--|--|--|--|--|--|--|--|--|--|--|--|--|--|--|--|--|--|--|--|--|--|--|--|--|--|--|--|--|--|--|--|--|--|--|--|--|--|--|--|--|--|--|--|--|--|--|--|--|--|--|--|--|--|--|--|--|--|--|--|--|--|--|--|--|--|--|--|--|--|--|--|--|--|--|--|--|--|--|--|--|--|--|--|--|--|--|--|--|--|--|--|--|--|--|--|--|--|--|--|--|--|--|--|--|--|--|--|--|--|--|--|--|--|--|--|--|--|--|--|--|--|--|--|--|--|--|--|--|--|--|--|--|--|--|--|--|--|--|--|--|--|--|--|--|--|--|--|--|--|--|--|--|--|--|--|--|--|--|--|--|--|--|--|--|--|--|--|--|--|--|--|--|--|--|--|--|--|--|--|--|--|--|--|--|--|--|--|--|--|--|--|--|--|--|--|



| Author             | Study                                                                                                    | Design       | Year      | Age (years) | Follow-up (years) | N                                    | Events | HR    | 95% CI | Exposure                                                                                 | hPDI              | uPDI                  | Outcomes                                                                                                                                                                                                                                                                                                                                                                                                                                                                                                                                                                                           |
|--------------------|----------------------------------------------------------------------------------------------------------|--------------|-----------|-------------|-------------------|--------------------------------------|--------|-------|--------|------------------------------------------------------------------------------------------|-------------------|-----------------------|----------------------------------------------------------------------------------------------------------------------------------------------------------------------------------------------------------------------------------------------------------------------------------------------------------------------------------------------------------------------------------------------------------------------------------------------------------------------------------------------------------------------------------------------------------------------------------------------------|
| Ambika Satija 2018 | Nurses' Health Study (NHS), Nurses' Health Study II (NHSII), Health Professionals Follow-up Study (HPFS) | Cohort Study | 1984-2013 | 45.49       | 79.33             | 8631                                 | 209298 | 25.16 | 25.7   | Food frequency questionnaire (FFQ)                                                       | hPDI<br>、<br>uPDI | CHD                   | not), smoking status (current, former or never smoking), frequency of alcohol consumption (never, < 1 times/week or ≥ 1 times/week), frequency of exercise vigorously (never/rarely, 1–4 times/month, 2–4 times/week or ≥ 5 times/week), total energy intake (in quintiles) and BMI (< 23.0, 23.0–24.9, 25.0–29.9, 30.0–34.9 or ≥ 35.0 kg/m <sup>2</sup> ). Age, smoking status, physical activity, alcohol intake, multivitamin use, aspirin use, family history of CHD, margarine intake, energy intake, baseline hypertension, hypercholesterolemia, and diabetes, and updated body mass index. |
| Hyunju Kim 2018    | the ARIC study                                                                                           | Cohort Study | 1987-2016 | 53.82       | 55.28             | 4381 for CVD, 1565 for CVD mortality | 12168  | NA    | 25     | A modified version of the 66-item semiquantitative Willett food frequency questionnaire. | hPDI<br>、<br>uPDI | CVD、<br>CVD mortality | Age, sex, race-center, total energy intake, education, smoking status, physical activity, alcohol consumption, and margarine consumption. hPDI indicates healthy plant-based diet index; PDI, overall plant-based diet index; uPDI, less healthy (unhealthy) plant-based diet index.                                                                                                                                                                                                                                                                                                               |

|                        |                                                                                                         |                 |               |           |       |       |        |       |     |                                                                        |                   |                                 |                                                                                                                                                                                                                                                                                                                                                                                                                                                                                                                                                                                                                                                                                                                                                                                                                                                                                                                                                                                                                                                                                                                                                                                                                                                                                                                             |
|------------------------|---------------------------------------------------------------------------------------------------------|-----------------|---------------|-----------|-------|-------|--------|-------|-----|------------------------------------------------------------------------|-------------------|---------------------------------|-----------------------------------------------------------------------------------------------------------------------------------------------------------------------------------------------------------------------------------------------------------------------------------------------------------------------------------------------------------------------------------------------------------------------------------------------------------------------------------------------------------------------------------------------------------------------------------------------------------------------------------------------------------------------------------------------------------------------------------------------------------------------------------------------------------------------------------------------------------------------------------------------------------------------------------------------------------------------------------------------------------------------------------------------------------------------------------------------------------------------------------------------------------------------------------------------------------------------------------------------------------------------------------------------------------------------------|
| Lihui<br>Zhou<br>2024  | Multicentre<br>prospective<br>population-<br>based study<br>in the United<br>Kingdom<br>(UK<br>Biobank) | Cohort<br>Study | 2006-<br>2021 | 55.9<br>9 | 54.3  | 1734  | 189003 | 26.87 | 9.6 | 24-h dietary<br>assessment/The Oxford<br>WebQ dietary<br>questionnaire | hPDI<br>、<br>uPDI | CVD<br>mortality                | Age, menopausal status or<br>hormone replacement use in<br>females, ethnicity,<br>education, and quintiles of<br>the Townsend deprivation<br>index, familial history of<br>diseases (CVD, diabetes, or<br>cancers), smoking status,<br>alcohol drinking frequency,<br>body mass index, physical<br>activity, sedentary time,<br>total dietary energy intake,<br>multivitamin supplement<br>use, and the Charlson<br>Comorbidity Index.<br>Age, calendar year,<br>marriage status (married;<br>divorced, separated, or<br>single; or widowed), living<br>status (alone or not alone),<br>family history of<br>myocardial infarction (yes<br>or no), family history of<br>diabetes (yes or no), family<br>history of cancer (yes or<br>no), menopausal status (pre-<br>or postmenopausal [never,<br>past, or current menopausal<br>hormone use]; Nurses’<br>Health Study only),<br>multivitamin use (yes or<br>no), aspirin use (yes or<br>no),total energy intake<br>(quintile), smoking status<br>(never, former, or current<br>smoker [1-14, 15-24, or<br>_x005f 25 cigarettes/d]),<br>alcohol drinking (0, 0.1-4.9,<br>5.0-14.9, 15.0-19.9, 20.0-<br>29.9, or 30 g/d), physical<br>activity (quintile), history of<br>hypertension (yes or no),<br>history of<br>hypercholesterolemia (yes<br>or no), and body mass index |
| Zhilei<br>Shan<br>2023 | The NHS<br>and HPFS                                                                                     | Cohort<br>Study | 1984-<br>2020 | 51.3<br>5 | 63.10 | 12769 | 119315 | 25.08 | 36  | Food frequency<br>questionnaire (FFQ)                                  | hPDI              | CVD<br>mortality<br>、<br>Stroke |                                                                                                                                                                                                                                                                                                                                                                                                                                                                                                                                                                                                                                                                                                                                                                                                                                                                                                                                                                                                                                                                                                                                                                                                                                                                                                                             |

(<21, 21-24.9, 25-29.9, 30-34.9, or 35 [calculated as weight in kilograms divided by height in meters squared])).

Age, initial plant-based diet index score, race, family history of myocardial infarction, diabetes, or cancer, aspirin use, multivitamins use, initial body mass index, menopausal status and hormone use in women, smoking status, initial and changes in each of smoking pack-years, physical activity, total energy intake, alcohol consumption, and margarine intake, weight change, history of hypertension, hypercholesterolemia, or type 2 diabetes, antihypertensive medication use, and cholesterol-lowering medication use.



|                       |                                                                                                         |              |           |       |        |                                                                |        |       |      |                                    |                   |                                                   |                                                                                                                                                                                                                                                                                                                                                                                                                                                                                                                                                                                                                                                            |
|-----------------------|---------------------------------------------------------------------------------------------------------|--------------|-----------|-------|--------|----------------------------------------------------------------|--------|-------|------|------------------------------------|-------------------|---------------------------------------------------|------------------------------------------------------------------------------------------------------------------------------------------------------------------------------------------------------------------------------------------------------------------------------------------------------------------------------------------------------------------------------------------------------------------------------------------------------------------------------------------------------------------------------------------------------------------------------------------------------------------------------------------------------------|
| Megu Y. Baden 2021    | Nurses' Health Study (NHS), Nurses' Health Study II (NHSII), Health Professionals Follow-up Study(HPFS) | Cohort Study | 1984-2017 | 54.7  | 79.35  | 6241 total strokes (3015 ischemic and 853 hemorrhagic strokes) | 209508 | NA    | 28   | Food frequency questionnaire (FFQ) | hPDI<br>、<br>uPDI | Stroke、<br>Ischemic stroke、<br>Hemorrhagic stroke | Age, smoking status, alcohol intake, physical activity, multivitamin use, aspirin use, margarine intake, total energy intake, body mass index, postmenopausal hormone use (Nurses' Health Study [NHS] and NHSII), oral contraceptive use (NHSII), hypertension, hypercholesterolemia, diabetes, antihypertensive use, and a ticholesterol medication use shown. Sex, age, ethnicity, educational level, deprivation index and region of assessment, smoking status, energy intake, alcohol consumption, margarine consumption and body mass index, sleep time, sociability, number of medications, dietary supplementation and number of chronic diseases. |
| Maroto-Rodriguez 2024 | Multicentre prospective population-based study in the United Kingdom (UK Biobank)                       | Cohort Study | 2009-2019 | 59    | 52.00  | 428                                                            | 24996  | NA    | 6.72 | Oxford WebQ                        | hPDI<br>、<br>uPDI | frailty                                           | Age (months), calendar time (4-year intervals), body mass index (<25.0, 25.0–29.9, and ≥30.0 kg/m status, smoking status (never, past and current; 1–14, 15–24, and ≥25 cigarettes per day), alcohol intake (0, 1.0–4.9, 5.0–14.9 or ≥15.0 g/day), energy intake (quintiles of kcal/day), mar_x0002_garine intake, and medication use (aspirin, postmenopausal hormone therapy, diuretics, β-blockers, calcium channel blockers, ACE inhibitors,                                                                                                                                                                                                           |
| Sotos-Prieto 2022     | Nurses' Health Study (NHS)                                                                              | Cohort Study | 1992-2014 | 64.16 | 100.00 | 12910                                                          | 82234  | 25.66 | 38   | Food frequency questionnaire (FFQ) | hPDI<br>、<br>uPDI | frailty                                           | Age (months), calendar time (4-year intervals), body mass index (<25.0, 25.0–29.9, and ≥30.0 kg/m status, smoking status (never, past and current; 1–14, 15–24, and ≥25 cigarettes per day), alcohol intake (0, 1.0–4.9, 5.0–14.9 or ≥15.0 g/day), energy intake (quintiles of kcal/day), mar_x0002_garine intake, and medication use (aspirin, postmenopausal hormone therapy, diuretics, β-blockers, calcium channel blockers, ACE inhibitors,                                                                                                                                                                                                           |

|                       |                                                       |              |           |       |       |      |      |       |    |                                                              |                   |         |                                                                                                                                                                                                                                                                                                                                                                                                                                                                                                                                                                                                                                                                                            |
|-----------------------|-------------------------------------------------------|--------------|-----------|-------|-------|------|------|-------|----|--------------------------------------------------------------|-------------------|---------|--------------------------------------------------------------------------------------------------------------------------------------------------------------------------------------------------------------------------------------------------------------------------------------------------------------------------------------------------------------------------------------------------------------------------------------------------------------------------------------------------------------------------------------------------------------------------------------------------------------------------------------------------------------------------------------------|
|                       |                                                       |              |           |       |       |      |      |       |    |                                                              |                   |         | other blood pressure medication, statins and other cholesterol lowering drugs, insulin, oral hypoglycaemic medication) and physical activity.                                                                                                                                                                                                                                                                                                                                                                                                                                                                                                                                              |
| Qi 2023               | Chinese Longitudinal Healthy Longevity Survey (CLHLS) | Cohort Study | 2008-2018 | 80.74 | 46.20 | 1987 | 2883 | NA    | 10 | Food frequency questionnaire (FFQ)                           | hPDI<br>、<br>uPDI | frailty | Age and gender, type pf residence, economic situation, residence status, marital status, smoking status, alcohol consumption, exercise status, and BMI. Sex, age, educational level (primary, secondary, university), alcohol consumption, smoking status (current, former, never), BMI (<25, 25–29.9,≥30), energy intake, physical activity, prevalent diseases (type 2 diabetes mellitus, cardiovascular disease [myocardial infarction, stroke, or heart failure], chronic lung disease [asthma or chronic obstructive pulmonary disease], osteomuscular disease [osteoarthritis, rheumatoid arthritis or hip fracture], cancer and depression), medicines consumption (0, 1–3, 4–6,>6) |
| Maroto-Rodriguez 2022 | Spanish the Seniors-ENRICA-1 cohort                   | Cohort Study | 2008-2012 | 68.7  | 51.70 | 136  | 1880 | 28.05 | 4  | Validated computerized face-to-face diet history (DH-ENRICA) | hPDI<br>、<br>uPDI | frailty |                                                                                                                                                                                                                                                                                                                                                                                                                                                                                                                                                                                                                                                                                            |

|                        |                                                                                   |              |           |      |       |      |        |      |     |                                    |                   |          |                                                                                                                                                                                                                                                                                                                                                                                                                                                                                                                                                                                                                                                                                                                                                                                                     |
|------------------------|-----------------------------------------------------------------------------------|--------------|-----------|------|-------|------|--------|------|-----|------------------------------------|-------------------|----------|-----------------------------------------------------------------------------------------------------------------------------------------------------------------------------------------------------------------------------------------------------------------------------------------------------------------------------------------------------------------------------------------------------------------------------------------------------------------------------------------------------------------------------------------------------------------------------------------------------------------------------------------------------------------------------------------------------------------------------------------------------------------------------------------------------|
| Wu 2023                | Multicentre prospective population-based study in the United Kingdom (UK Biobank) | Cohort Study | 2009-2021 | 57   | 56.20 | 1248 | 180532 | 26.3 | 10  | Food frequency questionnaire (FFQ) | hPDI<br>、<br>uPDI | dementia | Age, sex, BMI, ethnicity, smoking status, alcohol drinking status, education level, visiting friends, living alone, PA, total energy intake, medication history (use of antihypertensive, lipid-lowering, and hypoglycaemic medication), Townson depressive index, family history disease (dementia and depression), hypertension and diabetes. Age at cognitive status measurement, sex, dialect group, marital status, education level, smoking status, physical activity, sleep duration, BMI, total energy intake. Analyses for the DASH, PDI, and hPDI indexes were additionally adjusted for alcohol consumption, and analyses for the aMED, DASH, and AHEI-2010 were additionally adjusted for tea and coffee intake, history of hypertension, diabetes, cardiovascular disease, and cancer. |
| Wu 2019                | The Singapore Chinese Health Study                                                | Cohort Study | 1993-2016 | 73.2 | 59.20 | 2443 | 16948  | NA   | 20  | Food frequency questionnaire (FFQ) | hPDI              | dementia | Sex, age, residence, education, occupation, smoking status, alcohol consumption, regular exercise, financial independence, and health conditions.                                                                                                                                                                                                                                                                                                                                                                                                                                                                                                                                                                                                                                                   |
| Fang 2022              | Chinese Longitudinal Healthy Longevity Survey (CLHLS)                             | Cohort Study | 2011-2018 | 80.7 | 49.39 | 1077 | 4792   | 22   | 7   | Food frequency questionnaire (FFQ) | hPDI<br>、<br>uPDI | dementia | Age, waist circumference, education level (middle school or below, high school, or college or above), smoking status (never, past, or current smoker), alcohol consumption (non-drinker                                                                                                                                                                                                                                                                                                                                                                                                                                                                                                                                                                                                             |
| Khongorzul Ganbat 2024 | Genomic cohort survey of the Korean population (HEXA)                             | Cohort Study | 2004-2016 | 52.8 | 0.00  | 2017 | 12356  | 24.1 | 4.2 | Food frequency questionnaire (FFQ) | hPDI<br>、<br>uPDI | CHD      |                                                                                                                                                                                                                                                                                                                                                                                                                                                                                                                                                                                                                                                                                                                                                                                                     |

or current drinker),  
household income level (<3  
or  $\geq$ 3 million Korean  
won/mo), physical activity  
(yes or no), and energy  
intake.

---
